# Supplementary material for: Effects of monoamine manipulations on the personality and gene expression of three-spined sticklebacks
Source: Oxford University Press journal article supplement (doi:10.1242/jeb.211888), 2019-10-15
Supplement: jeb211888supp.pdf [file jeb211888supp.pdf]

Table S1. The influence of different concentrations of ropinirole hydrochloride on stickleback behavior. Pilot study results. Average values for the measured behaviors: Latency to move NA (latency to move in a novel area), number of square changes in a novel area, time in the upper middle zone of a novel area, latency to swim during the mirror test, number of times the fish approached the mirror, and time spent close to a mirror. N = 17.

| Dose (ng/l) | Latency to move NA (sec) | number sq changes | time in upper mid (min:sec) | lat to move mirror (sec) | time close (min:sec) | num bouts mirror |
|-------------|--------------------------|-------------------|-----------------------------|--------------------------|----------------------|------------------|
| 0           | 8.3                      | 66.0              | 2:02                        | 20.0                     | 2:26                 | 12.3             |
| 40          | 1.2                      | 41.8              | 1:45                        | 11.0                     | 2:18                 | 5.2              |
| 2500        | 6.0                      | 9.5               | 6:17                        | 5.0                      | 2:22                 | 1.0              |
| 50000       | 4.4                      | 11.7              | 5:29                        | 3.0                      | 1:37                 | 1.6              |
| 150000      | 0.0                      | 17.8              | 0:11                        | 5.5                      | 0:44                 | 4.3              |

Table S2. Primers used to measure brain gene expression of stickleback. Gene name on Ensembl, Ensembl gene ID, forward and reverse primer sequence, amplicon length and thermocycling temperature in Celsius. From Aubin-Horth et al., 2012; Di Poi et al., 2016; Hibbeler et al., 2008 or designed using sequences from the Ensembl Genome Browser for *Gasterosteus aculeatus*.

| Gene name   | Ensembl gene ID    | Forward primer sequence | Reverse primer sequence | Amplicon length (bp) | Temp (°C) |
|-------------|--------------------|-------------------------|-------------------------|----------------------|-----------|
| DRD1b       | ENSGACG00000020716 | GACGTGTTTGTGTGGTTCCG    | GATTCGATGGCGTTGCTCC     | 138                  | 60        |
| GR1 (nr3c1) | ENSGACG00000018209 |                         | Aubin-Horth et al. 2012 |                      |           |
| MR (nr3c2)  | ENSGACG00000017193 |                         | Aubin-Horth et al. 2012 |                      |           |
| htr2a       | ENSGACG00000008088 |                         | Di Poi et al. 2014      |                      |           |
| htr2b       | ENSGACG00000009251 |                         | Di Poi et al. 2014      |                      |           |
| DRD2        | ENSGACG00000009131 |                         | Di Poi et al. 2014      |                      |           |
| adrb2a      | ENSGACG00000018455 |                         | Di Poi et al. 2014      |                      |           |
| UBC         | NA                 |                         | Hibbeler et al. 2008    |                      |           |
| RPL13a      | NA                 |                         | Hibbeler et al. 2008    |                      |           |
